# Supplementary material for: Breastfeeding, Gestational Diabetes Mellitus, Size at Birth and Overweight/Obesity in Early Childhood
Source: MDPI journal article supplement (doi:10.3390/nu16091351), 2024-04-30
Supplement: s1 [file s1]

**Table S1.** Associations of duration of full breastfeeding and the risk of overweight/obesity in early childhood among all participants.

| <b>Duration</b> | <b>N (%)</b> | <b>OR (95% CI)</b>       | <b>aOR (95% CI)</b>      |
|-----------------|--------------|--------------------------|--------------------------|
| <1 month        | 3702 (19.3)  | Ref.                     | Ref.                     |
| 1-2 months      | 643 (18.7)   | <b>0.96 (0.87, 1.05)</b> | 0.99 (0.90, 1.09)        |
| 3-5 months      | 2059 (14.0)  | <b>0.68 (0.64, 0.72)</b> | <b>0.75 (0.71, 0.80)</b> |
| ≥ 6 months      | 600 (15.8)   | <b>0.78 (0.71, 0.86)</b> | <b>0.85 (0.77, 0.93)</b> |

**Abbreviation:** aOR: adjusted odds ratio; CI: confidence intervals; OR: odds ratio

**Adjusted for:** maternal age, maternal educational levels, parity, gravidity, gestational diabetes mellitus status, hypertensive disorders of pregnancy, neonatal gender, gestational age at delivery, mode of delivery, early-pregnancy body mass index, weight gain during pregnancy, anthropometric measurements at 9 months.

**Table S2.** Associations of GDM status and duration of full breastfeeding with the risk of overweight/obesity in early childhood.

| <b>GDM</b> | <b>Duration</b> | <b>OR (95% CI)</b>       | <b>aOR (95% CI)</b>      |
|------------|-----------------|--------------------------|--------------------------|
| No         | <1 month        | Ref.                     | Ref.                     |
| No         | 1-2 months      | <b>0.96 (0.87, 1.07)</b> | 1.04 (0.92, 1.18)        |
| No         | 3-5 months      | <b>0.70 (0.66, 0.75)</b> | <b>0.87 (0.80, 0.94)</b> |
| No         | ≥ 6 months      | <b>0.80 (0.72, 0.89)</b> | <b>0.83 (0.73, 0.95)</b> |
| Yes        | <1 month        | <b>1.10 (1.01, 1.20)</b> | <b>1.11 (1.02, 1.21)</b> |
| Yes        | 1-2 months      | 1.03 (0.85, 1.26)        | 1.10 (0.87, 1.40)        |
| Yes        | 3-5 months      | <b>0.65 (0.57, 0.73)</b> | 0.97 (0.84, 1.12)        |
| Yes        | ≥ 6 months      | <b>0.79 (0.64, 0.98)</b> | <b>0.63 (0.48, 0.83)</b> |

**Abbreviation:** aOR: adjusted odds ratio; CI: confidence intervals; GDM: gestational diabetes mellitus; OR: odds ratio

**Adjusted for:** maternal age, maternal educational levels, parity, gravidity, hypertensive disorders of pregnancy, neonatal gender, gestational age at delivery, mode of delivery, early-pregnancy body mass index, weight gain during pregnancy, anthropometric measurements at 9 months

**Table S3.** Associations of size at birth and duration of full breastfeeding with the risk of overweight/obesity in early childhood.

| Size at birth | Duration   | OR (95% CI)              | aOR (95% CI)             |
|---------------|------------|--------------------------|--------------------------|
| SGA           | <1 month   | <b>0.34 (0.28, 0.42)</b> | <b>0.41 (0.33, 0.50)</b> |
| SGA           | 1-2 months | <b>0.36 (0.23, 0.56)</b> | <b>0.44 (0.28, 0.68)</b> |
| SGA           | 3-5 months | <b>0.30 (0.24, 0.39)</b> | <b>0.42 (0.33, 0.55)</b> |
| SGA           | ≥ 6 months | <b>0.38 (0.25, 0.57)</b> | <b>0.55 (0.36, 0.83)</b> |
| AGA           | <1 month   | Ref.                     | Ref.                     |
| AGA           | 1-2 months | 1.00 (0.89, 1.11)        | 1.01 (0.91, 1.13)        |
| AGA           | 3-5 months | <b>0.67 (0.63, 0.72)</b> | <b>0.72 (0.67, 0.77)</b> |
| AGA           | ≥ 6 months | <b>0.79 (0.71, 0.88)</b> | <b>0.83 (0.74, 0.92)</b> |
| LGA           | <1 month   | <b>2.03 (1.86, 2.23)</b> | <b>1.55 (1.41, 1.71)</b> |
| LGA           | 1-2 months | <b>1.74 (1.41, 2.14)</b> | <b>1.41 (1.14, 1.73)</b> |
| LGA           | 3-5 months | <b>1.37 (1.22, 1.54)</b> | 1.12 (0.99, 1.25)        |
| LGA           | ≥ 6 months | <b>1.53 (1.24, 1.89)</b> | 1.17 (0.94, 1.45)        |

**Abbreviation:** aOR: adjusted odds ratio; AGA: appropriate for gestational age; CI: confidence intervals; LGA: large for gestational age; OR: odds ratio; SGA: small for gestational age

**Adjusted for:** maternal age, maternal educational levels, parity, gravidity, gestational diabetes mellitus status, hypertensive disorders of pregnancy, neonatal gender, gestational age at delivery, mode of delivery, early-pregnancy body mass index, weight gain during pregnancy, anthropometric measurements at 9 months

**Table S4.** Associations of duration of full breastfeeding with the risk of overweight/obesity in early childhood, stratified by GDM status during pregnancy and size at birth.

| Duration                     | N (%)       | OR (95% CI)              | aOR (95% CI)             |
|------------------------------|-------------|--------------------------|--------------------------|
| <b>Without GDM &amp; SGA</b> |             |                          |                          |
| <1 month                     | 74 (6.3)    | Ref.                     | Ref.                     |
| 1-2 months                   | 20 (7.6)    | 1.23 (0.73, 2.05)        | 1.56 (0.83, 2.92)        |
| 3-5 months                   | 62 (7.1)    | 1.13 (0.80, 1.60)        | 1.11 (0.72, 1.72)        |
| ≥ 6 months                   | 18 (6.6)    | 1.04 (0.61, 1.77)        | 0.87 (0.45, 1.70)        |
| <b>Without GDM &amp; AGA</b> |             |                          |                          |
| <1 month                     | 2200 (18.2) | Ref.                     | Ref.                     |
| 1-2 months                   | 406 (18.4)  | 1.01 (0.90, 1.14)        | 1.06 (0.94, 1.20)        |
| 3-5 months                   | 1294 (13.3) | <b>0.69 (0.64, 0.74)</b> | <b>0.75 (0.70, 0.81)</b> |
| ≥ 6 months                   | 377 (15.2)  | <b>0.81 (0.72, 0.91)</b> | <b>0.86 (0.77, 0.98)</b> |
| <b>Without GDM &amp; LGA</b> |             |                          |                          |
| <1 month                     | 640 (31.0)  | Ref.                     | Ref.                     |
| 1-2 months                   | 92 (26.7)   | 0.81 (0.63, 1.05)        | 0.80 (0.61, 1.04)        |
| 3-5 months                   | 368 (23.8)  | <b>0.69 (0.60, 0.81)</b> | <b>0.66 (0.56, 0.77)</b> |
| ≥ 6 months                   | 100 (26.9)  | <b>0.81 (0.64, 1.04)</b> | <b>0.75 (0.58, 0.97)</b> |
| <b>GDM &amp; SGA</b>         |             |                          |                          |
| <1 month                     | 29 (10.0)   | Ref.                     | Ref.                     |
| 1-2 months                   | 2 (6.2)     | 0.63 (0.14, 2.82)        | 0.29 (0.03, 3.12)        |
| 3-5 months                   | 3 (2.1)     | <b>0.19 (0.06, 0.64)</b> | <b>0.19 (0.04, 0.79)</b> |
| ≥ 6 months                   | 7 (15.9)    | 1.70 (0.68, 4.23)        | 1.79 (0.13, 24.60)       |
| <b>GDM &amp; AGA</b>         |             |                          |                          |
| <1 month                     | 532 (18.8)  | Ref.                     | Ref.                     |
| 1-2 months                   | 85 (17.4)   | 0.92 (0.71, 1.18)        | 0.88 (0.68, 1.14)        |
| 3-5 months                   | 245 (12.3)  | <b>0.60 (0.51, 0.71)</b> | <b>0.61 (0.51, 0.72)</b> |
| ≥ 6 months                   | 75 (14.6)   | <b>0.73 (0.56, 0.95)</b> | <b>0.69 (0.52, 0.91)</b> |
| <b>GDM &amp; LGA</b>         |             |                          |                          |
| <1 month                     | 227 (32.1)  | Ref.                     | Ref.                     |
| 1-2 months                   | 38 (31.7)   | 0.99 (0.65, 1.50)        | 1.00 (0.65, 1.52)        |
| 3-5 months                   | 87 (22.2)   | <b>0.61 (0.45, 0.81)</b> | <b>0.62 (0.45, 0.85)</b> |
| ≥ 6 months                   | 23 (21.1)   | <b>0.57 (0.35, 0.92)</b> | <b>0.51 (0.31, 0.85)</b> |

**Abbreviation:** aOR: adjusted odds ratio; AGA: appropriate for gestational age; CI: confidence intervals; GDM: gestational diabetes mellitus; LGA: large for gestational age; OR: odds ratio; SGA: small for gestational age. **Adjusted for:** maternal age, maternal educational levels, parity, gravidity, hypertensive disorders of pregnancy, neonatal gender, gestational age at delivery, mode of delivery, early-pregnancy body mass index, weight gain during pregnancy, anthropometric measurements at 9 months
